# Supplementary material for: Accurate determination of rare earth elements in small volumes of porewater from marine sediments by laser ablation solution sampling ICP-MS
Source: Royal Society of Chemistry journal article supplement (doi:10.1039/d2ja00236a), 2022-11-17
Supplement: d2ja00236a1.pdf [file d2ja00236a1.pdf]

## Electronic Supplementary Information

# Accurate determination of rare earth elements in small volumes of porewater from marine sediments by laser ablation solution sampling ICP-MS

Xiuhong Liao,<sup>a</sup> Wen Zhang,<sup>\*a</sup> Tao Yang,<sup>b</sup> Zhaochu Hu,<sup>a</sup> Tao Luo,<sup>a</sup> Xianli Zeng,<sup>a</sup>

Lian Zhou<sup>a</sup>

<sup>a</sup> *State Key Laboratory of Geological Processes and Mineral Resources, China*

*University of Geosciences, Wuhan, 430074, PR China*

<sup>b</sup> *State Key Laboratory for Mineral Deposits Research, School of Earth Sciences*

*and Engineering, Nanjing University, Nanjing, 210023, PR China*

*\*Author to whom correspondence should be sent.*

*Email: zchu@vip.sina.com, Tel.: +86 27 61055600, Fax: +86 27 67885096*

## Contents

### Equations used for concentration calculation

**Table S1.** Limits of detection ( $\text{pg mL}^{-1}$ ) of REEs analysed by LA-ICP-MS under different laser ablation pulse frequencies.

**Table S2.** Method detection limits ( $\text{pg mL}^{-1}$ ) of REEs analysed by LA-ICP-MS considering different enrichment factors under ablation condition of  $60\ \mu\text{m}$  and  $250\ \text{Hz}$ .

**Fig. S1** Schematic diagram of the experiment set-up.

**Fig. S2** Signal intensities of analytes versus time in a dissolved  $\text{Fe}(\text{OH})_3$ -precipitate solution analysed by LA-ICP-MS.

**Fig. S3** Calibration graphs for REEs.

## Equations used for concentration calculation

In this study, quantification for samples was carried out by calibration against the set of reference standard solutions, in conjunction with In used for internal standardization, using the following equations (mainly adapted from Longerich et al.<sup>1</sup>):

$$C_{REE - original\ sample} * V_{original\ sample} = C_{REE - final\ sample} * V_{final\ sample} \#(1)$$

$$\frac{S_{REE - final\ sample}}{S_{In - final\ sample}} = k * \frac{C_{REE - final\ sample}}{C_{In - final\ sample}} \#(2)$$

$$C_{In - standard} * V_{In - standard} = C_{In - final\ sample} * V_{final\ sample} \#(3)$$

where S, C, and V represent the signal intensity (with background signal subtracted), the concentration and the volume, respectively; k is the slope obtained from the calibration curve (Fig. S3); REE-original sample and REE-final sample represent REE in the original sample and in the final dissolved sample; In-standard and In-final sample represent In in the internal standard solution and in the final dissolved sample. By reorganizing the above equations, the following can be derived:

$$\begin{aligned} C_{REE - original\ sample} &= C_{REE - final\ sample} * \frac{V_{final\ sample}}{V_{original\ sample}} \\ &= \frac{S_{REE - final\ sample}}{S_{In - final\ sample} * k} * C_{In - final\ sample} * \frac{V_{final\ sample}}{V_{original\ sample}} \\ &= \frac{S_{REE - final\ sample}}{S_{In - final\ sample} * k} * \frac{C_{In - standard} * V_{In - standard}}{V_{final\ sample}} * \frac{V_{final\ sample}}{V_{original\ sample}} \\ &= \frac{S_{REE - final\ sample}}{k * S_{In - final\ sample}} * \frac{C_{In - standard} * V_{In - standard}}{V_{original\ sample}} \end{aligned}$$

where  $S_{REE - final\ sample}$  and  $S_{In - final\ sample}$  are the measured signal intensities,  $C_{In\ standard}$  and  $V_{In\ standard}$  are the known values, being 10 ng mL<sup>-1</sup> and 100 uL, respectively.

## Reference:

1. H. P. Longerich, S. E. Jackson and D. Günther, *J. Anal. At. Spectrom.*, 1996, **11**, 899–904.

**Table S1** Limits of detection ( $\text{pg mL}^{-1}$ ) of REEs analysed by LA-ICP-MS under different laser ablation pulse frequencies, with the laser ablation spot size fixed to 60  $\mu\text{m}$ . It should be noted that this set of values were calculated without consideration of the enrichment factor.

| Element | Laser ablation pulse frequency |       |        |        |
|---------|--------------------------------|-------|--------|--------|
|         | 20 Hz                          | 50 Hz | 100 Hz | 250 Hz |
| La139   | 1.9                            | 0.6   | 0.4    | 0.1    |
| Ce140   | 2.8                            | 0.7   | 0.5    | 0.1    |
| Pr141   | 1.9                            | 0.7   | 0.3    | 0.1    |
| Nd146   | 11.1                           | 3.5   | 1.7    | 0.6    |
| Sm147   | 10.9                           | 4.1   | 2.5    | 0.7    |
| Eu151   | 3.3                            | 1.4   | 0.6    | 0.2    |
| Gd158   | 6.7                            | 2.5   | 1.4    | 0.4    |
| Tb159   | 2.4                            | 0.8   | 0.3    | 0.1    |
| Dy163   | 7.8                            | 3.5   | 1.2    | 0.5    |
| Ho165   | 3.4                            | 0.5   | 0.3    | 0.1    |
| Er166   | 7.7                            | 1.6   | 1.0    | 0.3    |
| Tm169   | 2.0                            | 0.7   | 0.5    | 0.1    |
| Yb172   | 11.1                           | 3.1   | 1.5    | 0.6    |
| Lu175   | 3.2                            | 0.8   | 0.5    | 0.1    |

**Table S2** Method detection limits ( $\text{pg mL}^{-1}$ ) of REEs analysed by LA-ICP-MS considering different enrichment factors under ablation condition of 60  $\mu\text{m}$  and 250 Hz.

| Element | Original sample volume          |                   |                   |                   |
|---------|---------------------------------|-------------------|-------------------|-------------------|
|         | 2 mL                            |                   | 4 mL              |                   |
|         | Final dissolved solution volume |                   |                   |                   |
|         | 200 $\mu\text{L}$               | 100 $\mu\text{L}$ | 200 $\mu\text{L}$ | 100 $\mu\text{L}$ |
|         | Enrichment factor               |                   |                   |                   |
|         | 10                              | 20                | 20                | 40                |
| La139   | 0.01                            | 0.005             | 0.005             | 0.003             |
| Ce140   | 0.01                            | 0.005             | 0.005             | 0.003             |
| Pr141   | 0.01                            | 0.005             | 0.005             | 0.003             |
| Nd146   | 0.06                            | 0.030             | 0.030             | 0.015             |
| Sm147   | 0.07                            | 0.035             | 0.035             | 0.018             |
| Eu151   | 0.02                            | 0.010             | 0.010             | 0.005             |
| Gd158   | 0.04                            | 0.020             | 0.020             | 0.010             |
| Tb159   | 0.01                            | 0.005             | 0.005             | 0.003             |
| Dy163   | 0.05                            | 0.025             | 0.025             | 0.013             |
| Ho165   | 0.01                            | 0.005             | 0.005             | 0.003             |
| Er166   | 0.03                            | 0.015             | 0.015             | 0.008             |
| Tm169   | 0.01                            | 0.005             | 0.005             | 0.003             |
| Yb172   | 0.06                            | 0.030             | 0.030             | 0.015             |
| Lu175   | 0.01                            | 0.005             | 0.005             | 0.003             |

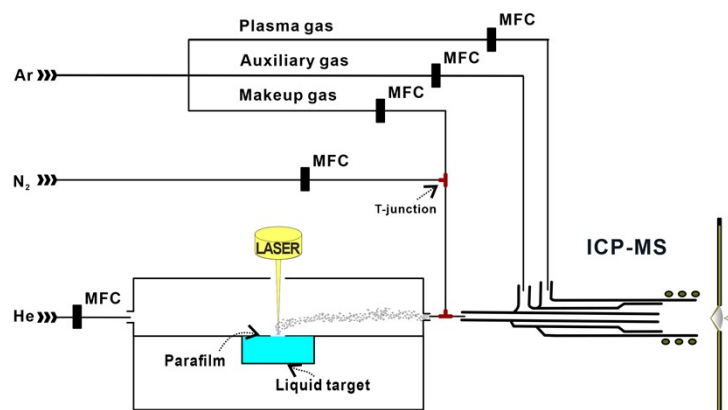

**Fig. S1** Schematic diagram of the experiment set-up of the laser ablation solution sampling ICP-MS system added with small amounts of nitrogen. MFC denotes mass flow controller.

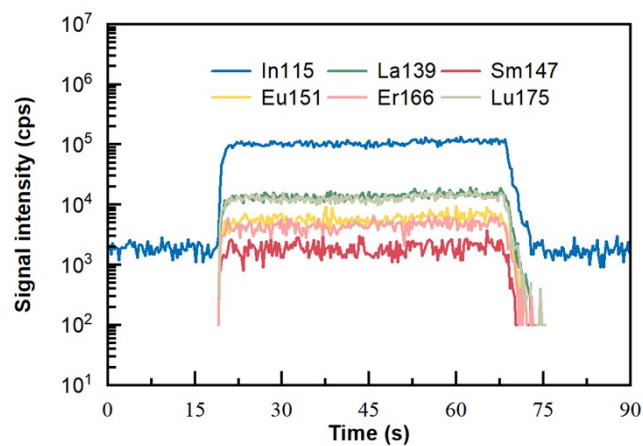

**Fig. S2** Signal intensities of analytes (REEs and the internal standard In) versus time in a dissolved Fe(OH)<sub>3</sub>-precipitate solution analysed by LA-ICP-MS under conditions of 60  $\mu\text{m}$ , 200 Hz. The initial mixed solution was made by about 24  $\text{pg mL}^{-1}$  of each REE spiked in a seawater sample.

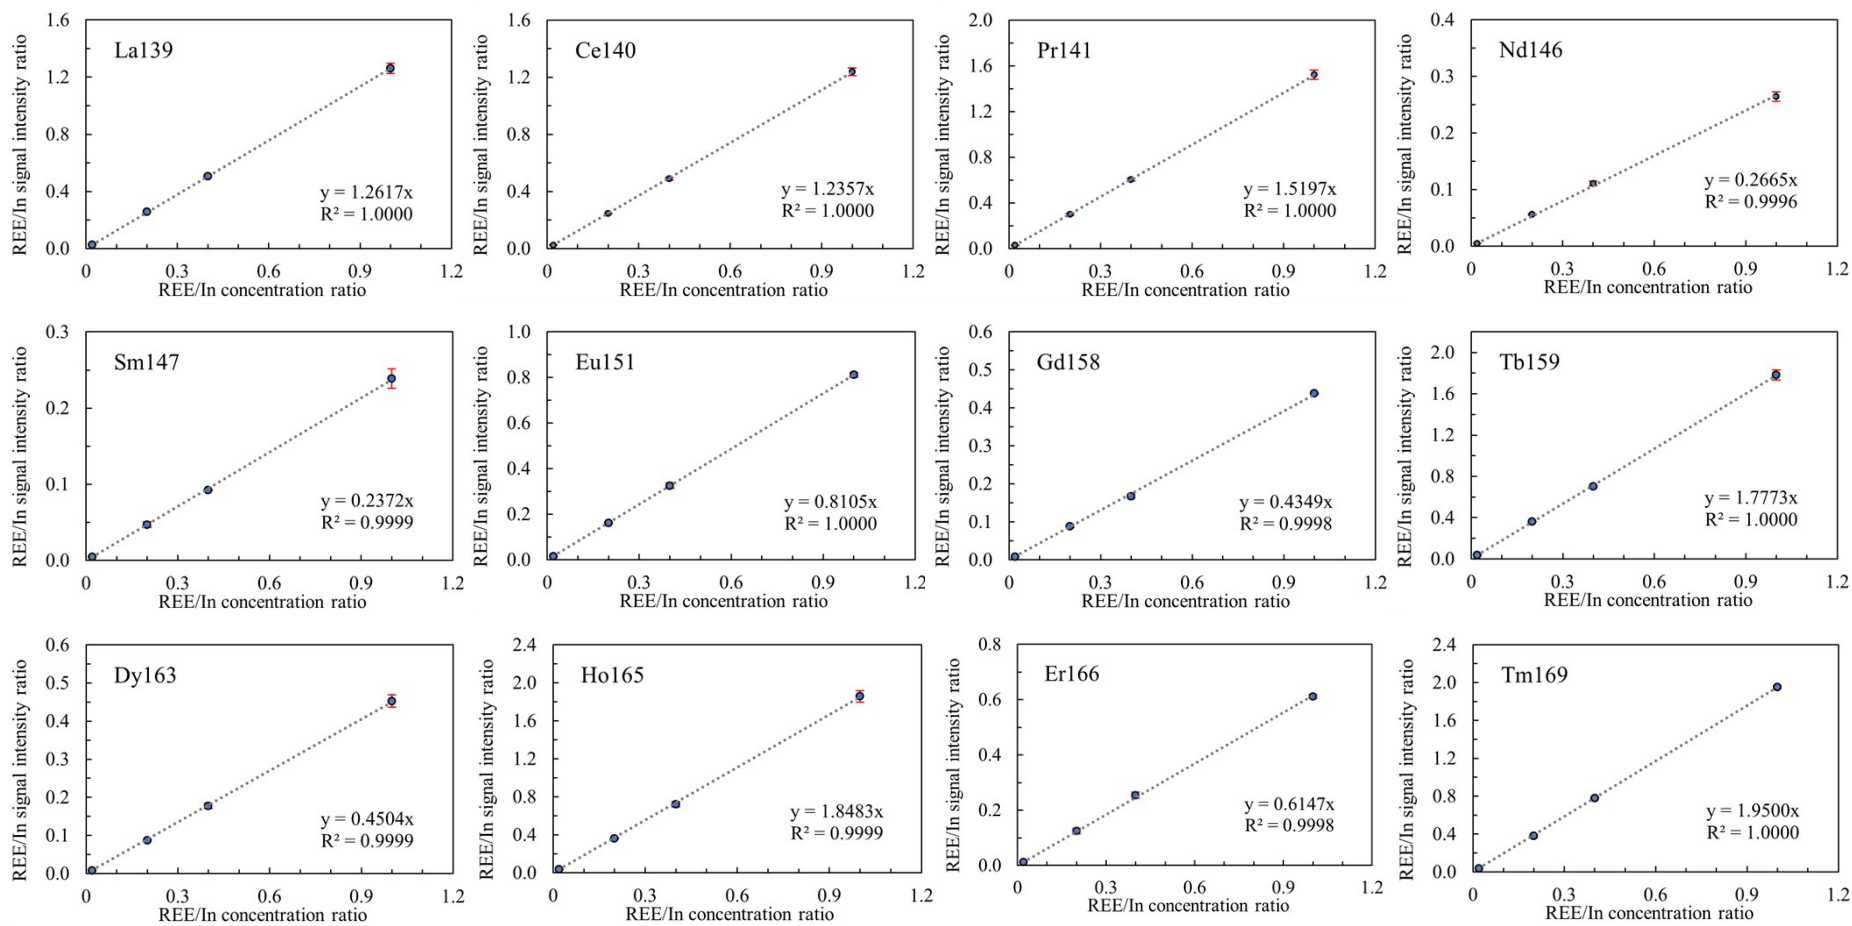



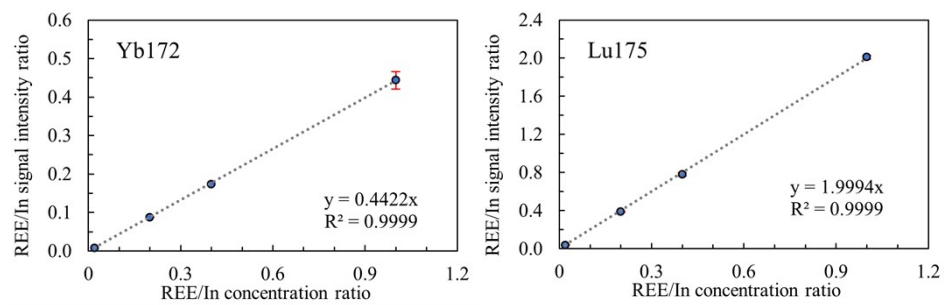

**Fig. S3** Calibration graphs for REEs ( $^{115}\text{In}$  served as the internal standard). Error bars represent sd (n=3).
